# Supplementary material for: Sequencing smart: De novo sequencing and assembly approaches for a non-model mammal
Source: PubMed Central journal article supplement (PMC7216774; doi:10.1093/gigascience/giaa045), 2020-05-12
Supplement: giaa045_response_to_reviewer_comments_original_submission.pdf [file giaa045_response_to_reviewer_comments_original_submission.pdf]

# Author's Response To Reviewer Comments

Close

Please see personal cover document Response.docx

Close
